# Supplementary material for: Mutant libraries reveal negative design shielding proteins from supramolecular self-assembly and relocalization in cells
Source: PubMed Central journal article supplement — Proc Natl Acad Sci U S A. 2022 Jan 25;119(5):e2101117119. doi: 10.1073/pnas.2101117119 (PMC8812688; doi:10.1073/pnas.2101117119), 2022-01-25
Supplement: pnas.2101117119.sapp.pdf [file pnas.2101117119.sapp.pdf]

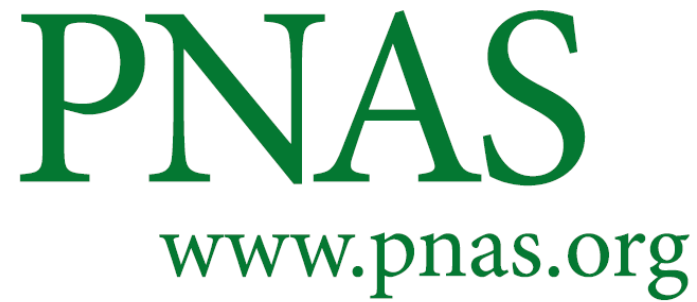

**Supplementary Information for**

Mutants libraries reveal negative design shielding proteins from supramolecular self-assembly and re-localization in cells.

Hector Garcia-Seisdedos, Tal Levin, Gal Shapira, Saskia Freud, Emmanuel D. Levy

Correspondence to Hector Garcia-Seisdedos

Email: [hector.garcia-seisdedos@weizmann.ac.il](mailto:hector.garcia-seisdedos@weizmann.ac.il)

**This PDF file includes:**

Figures S1 to S8  
Tables S1 to S2  
Legends for Datasets S1 to S3  
SI References

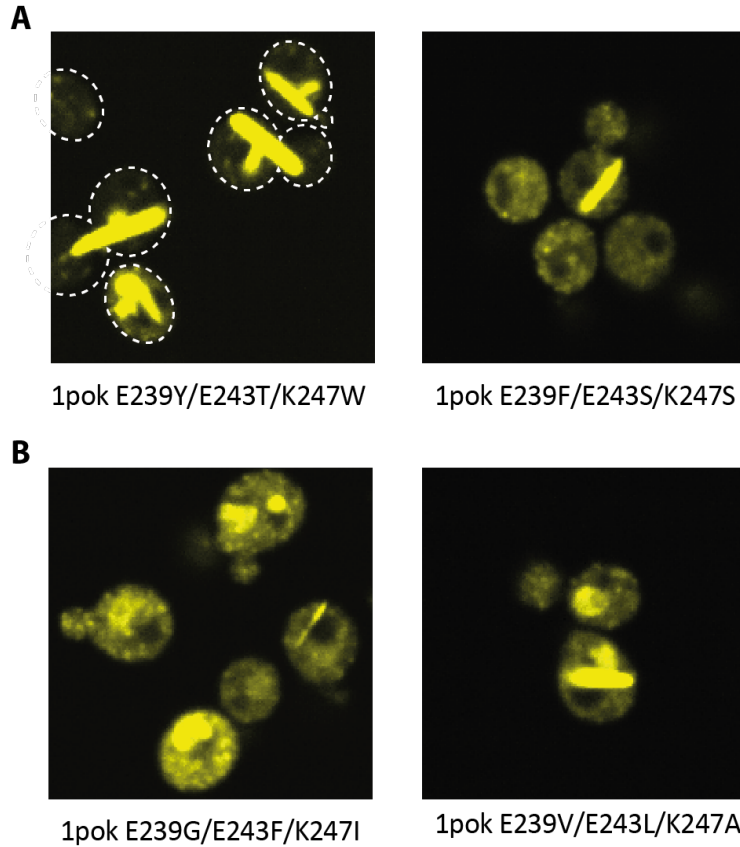

**Figure S1. Illustrative examples of phenotype heterogeneity.** **A** The penetrance of phenotypes can be variable, as illustrated with a mutant exhibiting fibers in most cells (left) and another mutant exhibiting fibers in a smaller fraction of cells (right). **B** Different phenotypes can also co-exist in the same cells. Both mutants show a mixture of nuclear localization and puncta phenotypes, with one cell also containing a fiber.

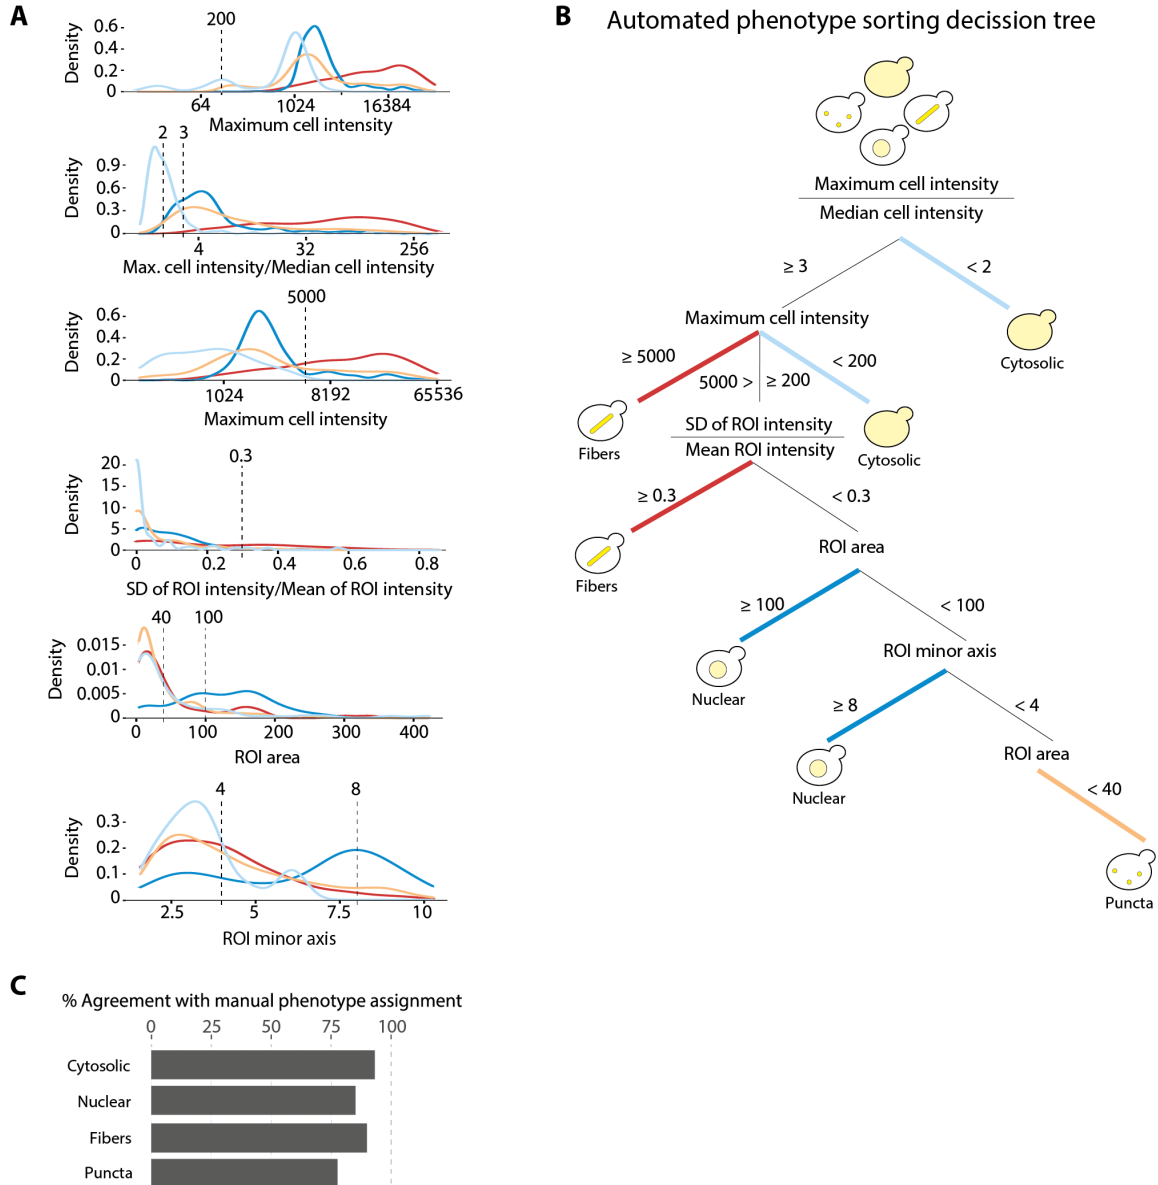

**Figure S2. Automated phenotype sorting. Calibration, decision tree, and validation. A.** Density distribution of several image properties used in the automated assignment of cells' phenotypes (Fiber, Cytosolic, Nuclear, and Puncta). Dashed lines show thresholds used in the phenotype sorting decision tree. **B.** Decision tree used to classify cells and regions of interest (ROI) inside of cells. A cell is initially classified based on the maximal fluorescence intensity detected within its boundaries. Subsequently, if bright regions (maximum/median fluorescence intensity ratio  $> 2.5$ ) are detected, each region is analyzed and assigned a "fiber," "nuclear," or "puncta" phenotype based on properties described in the tree. Ultimately, a cell is assigned the union of all phenotypes matching the ROIs within it. **C.** The parameters were optimized against a dataset of manually annotated cells (Methods), and we show the percent agreement between automated and manual annotations for each phenotype.

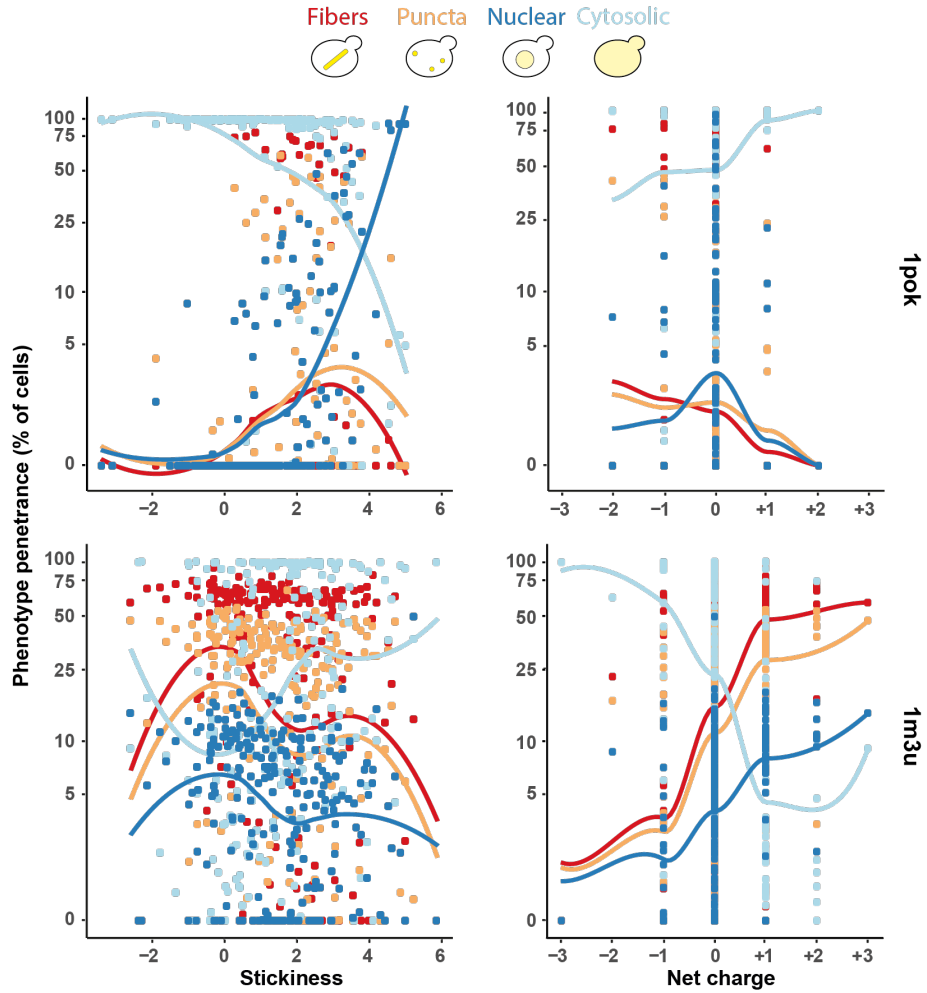

**Figure S3. Dependence of phenotype penetrance with the summed stickiness and net charge of the mutated triplets (all data shown).** In the graphs, each mutant is represented by four points accounting for the fiber, puncta, nuclear and cytosolic penetrance observed in that mutant.

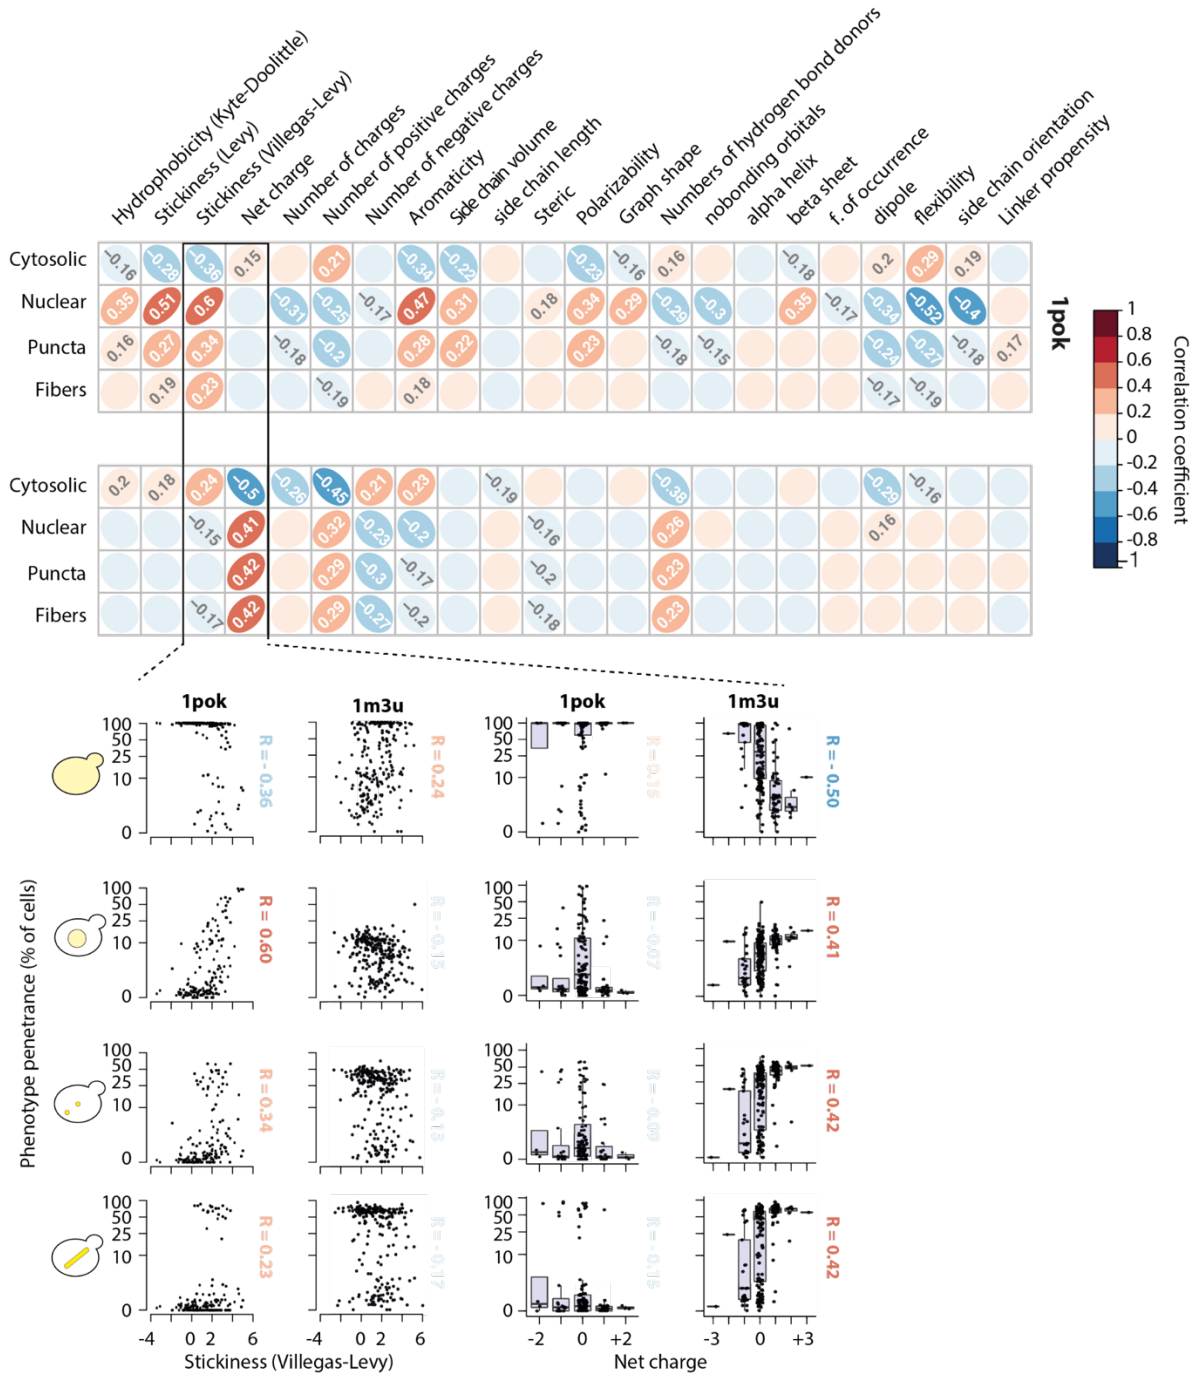

**Figure S4. Pearson correlations between phenotype penetrance and 22 physicochemical features of the three mutations observed in 1pok and 1m3u.** Only correlation coefficients larger or equal than  $|0.15|$  are displayed. Underneath we show scatterplots of the four main phenotypes' penetrance as a function of stickiness and net charge for 1pok and 1m3u mutants.

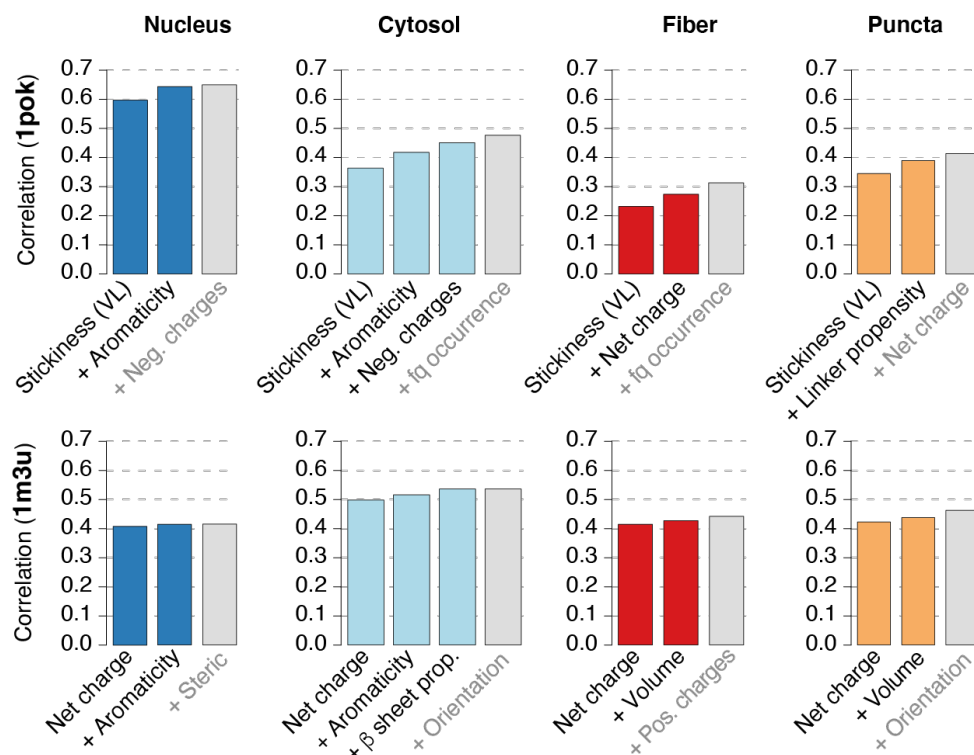

**Figure S5. Identifying physicochemical features most strongly associated with each phenotype.** For each phenotype, we selected features iteratively. The first feature was the one maximizing the correlation between phenotype penetrance and one of the 22 properties calculated of the mutated amino acids. The second feature was maximizing the partial correlation given the first feature, the third feature was maximizing the partial correlation given the first and second, etc. Up to four features were added in this way, or the procedure was stopped when a partial correlation was not significant (ANOVA,  $p > 0.05$ ). The features identified as significant are shown in color and the first non-significant feature is shown as a grey bar. In all cases, a single feature (stickiness in the case of 1pok, and net charge in the case of 1m3u) captures most of the variance that can be explained by the physicochemical properties of the mutations.

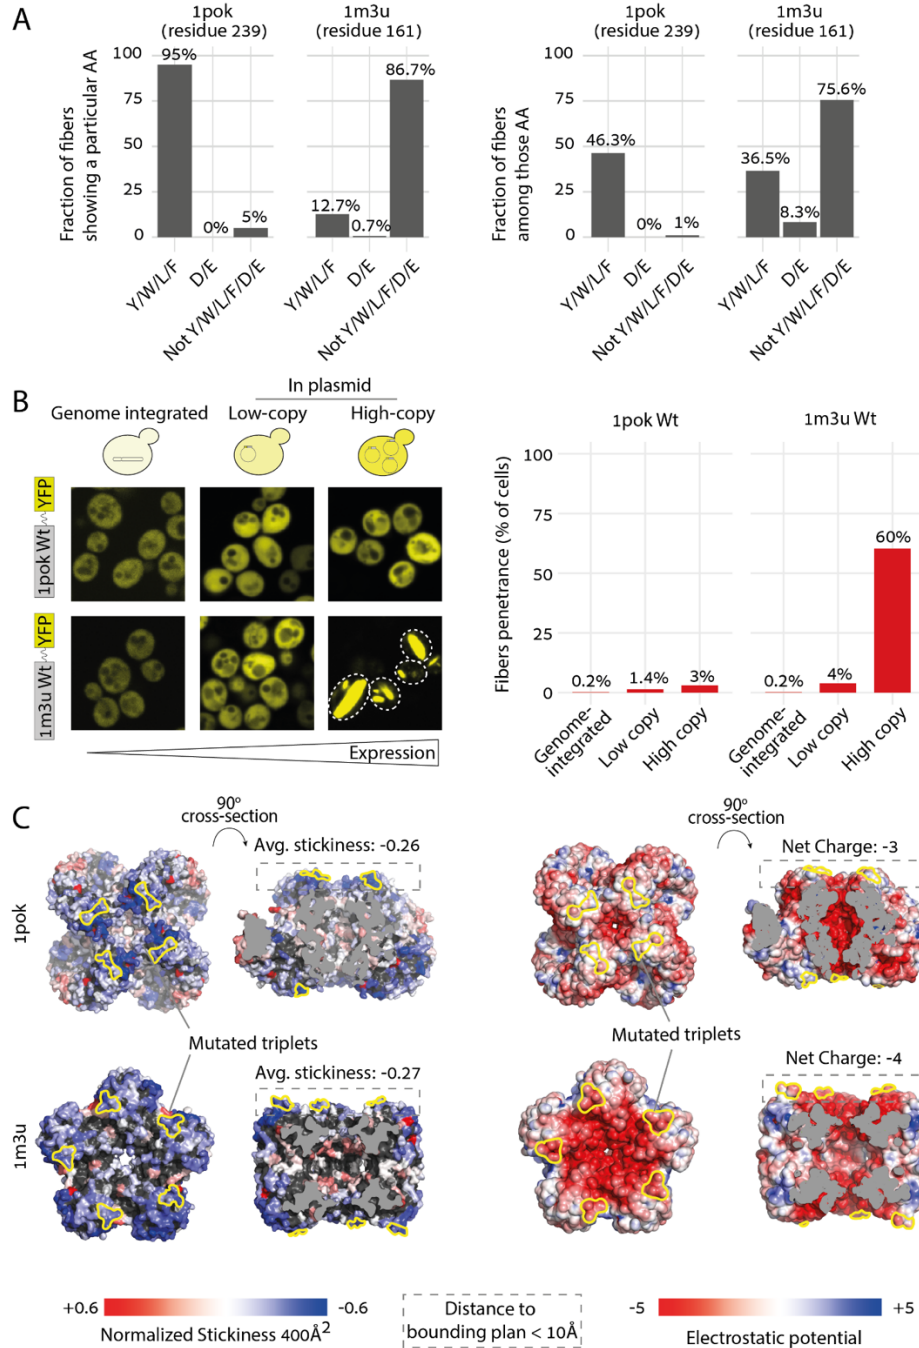

**Figure S6. Molecular and phenotypic differences of the two proteins investigated.** **A.** Left: barplot showing the percentage at which specific amino acids are found at positions 239 (1pok) and 161 (1m3u) among mutants displaying fibers. Right: barplot showing the percentage of mutants displaying fibers given specific residues at positions 239 (1pok) and 161 (1m3u). **B.** Left: fluorescence microscopy images of 1pok and 1m3u wild type sequences expressed from the same promoter in three different contexts yielding increasing expression: a genome integrated cassette, a low copy plasmid, and a high-copy plasmid. The barplot on the right shows the fraction of cells in which fibers were identified for both proteins in the three contexts. **C.** Stickiness and charge potential of 1pok and 1m3u surfaces. Residues with less than 25% of accessible surface area appear in black. Net charge values correspond to each subunit of the complex.

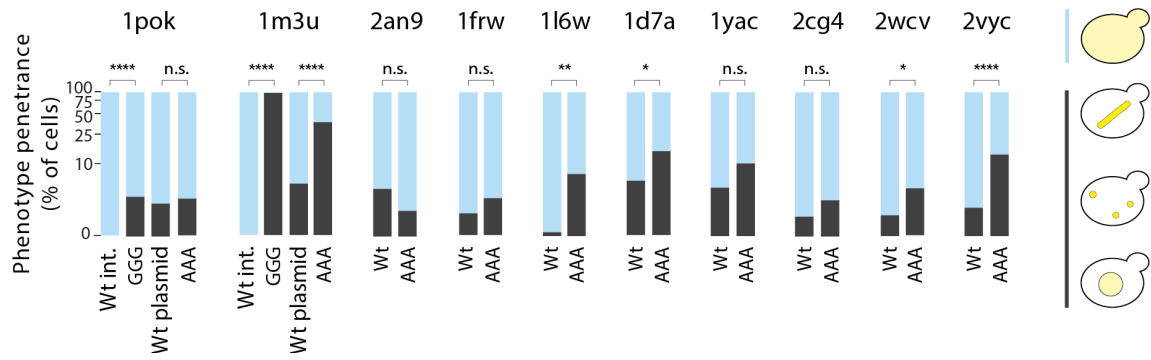

**Figure S7. Penetrance of non-cytosolic phenotypes for wild-type proteins and alanine or glycine mutants.** The fraction of cells with a non-cytosolic phenotype for the wild-type complex as well as alanine mutants for all ten complexes studied. Additionally, triple glycine mutants are shown for 1pok and 1m3u and compared to their genome-integrated wild-type counterparts. Statistical significance among wild-type/mutant pairs was calculated by the two-proportions Z-test.



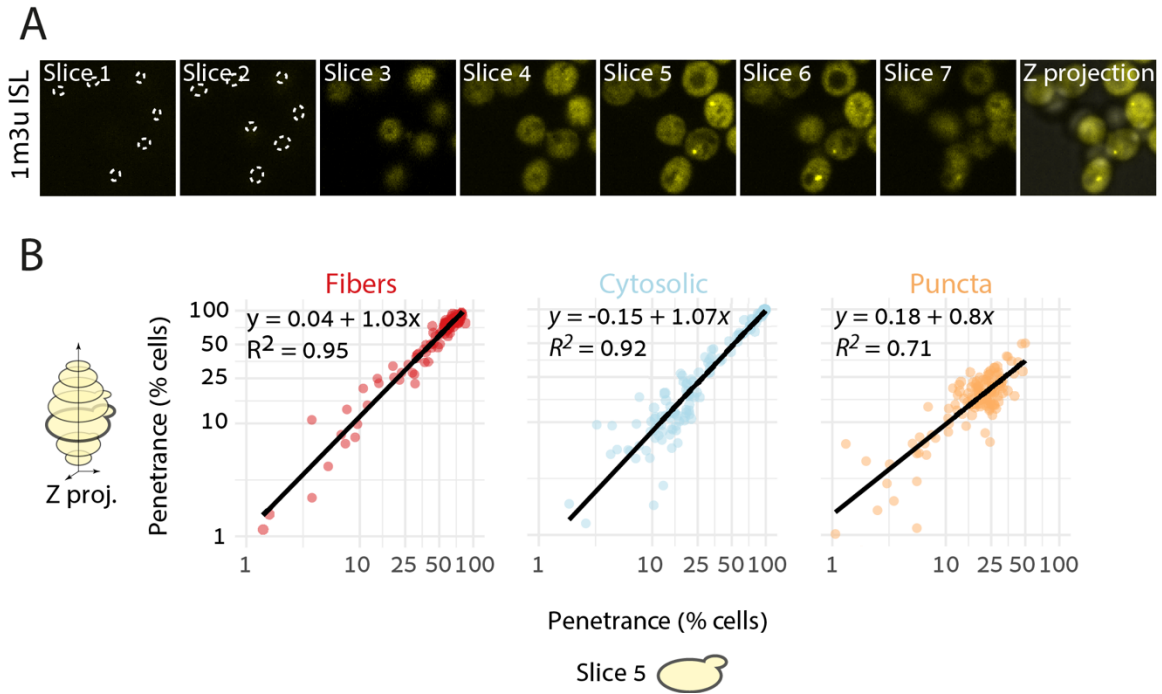

**Figure S8. Comparing penetrance values derived from a single Z-plane or a Z-stack. A.** a Z-stack consisting of seven image slices (slices 1-7) shows fluorescence associated with the mutant I/S/L of 1m3u. The average intensity projection of the seven slices (Z projection) is also shown. **B.** Phenotypes' penetrances for a set of 163 1m3u mutants calculated from the maximum intensity projection of slices 1-7 (Z projection) versus their penetrance calculated from slice 5.

**Table S1.** Details of homomers targeted for mutagenesis: PDB code, number of subunits, symmetry, ORF, mutated positions, linker, and fluorescent protein fused.

| PDB code | Gene Name   | Ref. | # subunits | MW (kDa, per subunit) | Symmetry | pI wild-type | pI Ala mut. | # + charges | # - charges | ORF        | Mutated residues | Linker     | Fluorophore     |
|----------|-------------|------|------------|-----------------------|----------|--------------|-------------|-------------|-------------|------------|------------------|------------|-----------------|
| 1POK     | <i>ladA</i> | (1)  | 8          | 41.1                  | D4       | 5.08         | 5.13        | 31          | 46          | Venus-1pok | E239/E243/K247   | GGGGSGGGGS | Venus (YFP) (2) |
| 1M3U     | <i>panB</i> | (3)  | 10         | 28.2                  | D5       | 5.15         | 5.5         | 20          | 30          | 1m3u-Venus | D157/E158/D161   | GGGGSGGGGS | Venus           |

**Table S2.** Details of additional eight homomers targeted for alanine mutations: PDB code, number of subunits, symmetry, ORF, mutated positions, linker, and fluorescent protein fused.

| PDB code | Gene name   | Ref.          | # subunits | MW (kDa, per subunit) | Symmetry | pI (WT) | pI Ala mutant | # + charges | # - charges | ORF        | Mutated residues    | Linker     | Fluorop. |
|----------|-------------|---------------|------------|-----------------------|----------|---------|---------------|-------------|-------------|------------|---------------------|------------|----------|
| 2AN9     | <i>gmk</i>  | (4)           | 6          | 23.6                  | D3       | 6.06    | 6.44          | 25          | 29          | 2an9-Venus | D60/E61/K63/E64     | GGGGSGGGGS | Venus    |
| 1D7A     | <i>purE</i> | (5)           | 8          | 16.9                  | D4       | 5.82    | 6.30          | 12          | 16          | Venus-1d7a | K11/E22/E25/D158    | GGGGSGGGGS | Venus    |
| 1FRW     | <i>mobA</i> | (6)           | 8          | 21.6                  | D4       | 5.88    | 6.23          | 19          | 24          | 1frw-Venus | D170/D173/K175/D176 | GGGGSGGGGS | Venus    |
| 2CG4     | <i>asnC</i> | (7)           | 8          | 17                    | D4       | 5.91    | 5.90          | 16          | 18          | Venus-2cg4 | K126/D131           | GGGGSGGGGS | Venus    |
| 1YAC     | <i>ycaC</i> | (8)           | 10         | 22.9                  | D5       | 5.35    | 5.32          | 20          | 25          | 1yac-Venus | D92/E94/K98/K101    | GGGGSGGGGS | Venus    |
| 1L6W     | <i>fsaA</i> | (9)           | 10         | 23                    | D5       | 5.90    | 5.55          | 17          | 19          | 1l6w-Venus | K97/K100/E102       | GGGGSGGGGS | Venus    |
| 2IV1     | <i>cynS</i> | Not Published | 10         | 17                    | D5       | 4.85    | 4.71          | 17          | 22          | 2iv1-Venus | K24/K25/D26         | GGGGSGGGGS | Venus    |
| 2VYC     | <i>adiA</i> | (10)          | 10         | 84.4                  | D5       | 5.12    | 5.15          | 62          | 96          | 2vyc-Venus | K491/D494/D497      | GGGGSGGGGS | Venus    |

**Dataset S1.** Details of the sequences, manually assigned phenotypes, and phenotypes penetrances of the 1pok mutants. Additionally, it shows the summed value of the mutated residues of each mutant for the 20 physicochemical features analyzed in this work. (The dataset is available as a separated CSV file).

**Dataset S2.** Details of the sequences, manually assigned phenotypes, and phenotypes penetrances of the 1m3u mutants. Additionally, it shows the summed value of the mutated residues of each mutant for the 20 physicochemical features analyzed in this work. (The dataset is available as a separated CSV file).

**Dataset S3.** The 20 numerical scales representing physicochemical and biochemical properties of amino acids, along with their identifier in the AA index database (<http://www.genome.jp/aaindex/>) when applicable. (The table is available as a separated CSV file)

## SI References

1. D. Jozic, J. T. Kaiser, R. Huber, W. Bode, K. Maskos, X-ray structure of isoaspartyl dipeptidase from E.coli: a dinuclear zinc peptidase evolved from amidohydrolases. *J. Mol. Biol.* **332**, 243–256 (2003).
2. T. Nagai, *et al.*, A variant of yellow fluorescent protein with fast and efficient maturation for cell-biological applications. *Nat. Biotechnol.* **20**, 87–90 (2002).
3. F. von Delft, *et al.*, Structure of E. coli ketopantoate hydroxymethyl transferase complexed with ketopantoate and Mg<sup>2+</sup>, solved by locating 160 selenomethionine sites. *Structure* **11**, 985–996 (2003).
4. G. Hible, *et al.*, Calorimetric and crystallographic analysis of the oligomeric structure of Escherichia coli GMP kinase. *J. Mol. Biol.* **352**, 1044–1059 (2005).
5. I. Mathews, T. J. Kappock, J. Stubbe, S. E. Ealick, Crystal structure of Escherichia coli PurE, an unusual mutase in the purine biosynthetic pathway. *Structure* **7**, 1395–1406 (1999).
6. M. W. Lake, C. A. Temple, K. V. Rajagopalan, The Crystal Structure of the Escherichia coli MobA Protein Provides Insight into Molybdopterin Guanine Dinucleotide Biosynthesis. *Journal of Biological* (2000).
7. P. Thaw, *et al.*, Structural insight into gene transcriptional regulation and effector binding by the Lrp/AsnC family. *Nucleic Acids Res.* **34**, 1439–1449 (2006).
8. C. Colovos, D. Cascio, T. O. Yeates, The 1.8 Å crystal structure of the ycaC gene product from Escherichia coli reveals an octameric hydrolase of unknown specificity. *Structure* **6**, 1329–1337 (1998).
9. S. Thorell, M. Schürmann, G. A. Sprenger, G. Schneider, Crystal Structure of Decameric Fructose-6-Phosphate Aldolase from Escherichia coli Reveals Inter-subunit Helix Swapping as a Structural Basis for Assembly Differences in the Transaldolase Family. *Journal of Molecular Biology* **319**, 161–171 (2002).
10. J. Andréll, *et al.*, Crystal structure of the acid-induced arginine decarboxylase from Escherichia coli: reversible decamer assembly controls enzyme activity. *Biochemistry* **48**, 3915–3927 (2009).
